# Supplementary material
Source: Research Square preprint supplement (doi:10.21203/rs.3.rs-10397304/v1)
Supplement: Supplementary file 1 [file 3733cf801b3f27369e7845c0.docx]

**APPENDIX / SUPPLEMENTARY MATERIALS**

**S1. Open-science declarations**

**Exploratory vs confirmatory.** This is a validation study of an existing dataset and was not preregistered. The two construct-validity correlation hypotheses (MHL inversely related to depression and to stigma) were specified a priori and are confirmatory; all other analyses, including the factor-structure modelling, are exploratory and are reported as such.

**S2. CRediT author contribution statement**

**Himanshu Thakur:** Conceptualisation, Methodology, Investigation, Data curation, Formal analysis, Writing – original draft.

**Geetesh Kumar Singh:** Conceptualisation, Methodology, Supervision, Validation, Writing – review & editing.

**S3. Instrument scoring registry**

- MHLS-HI (35 items): items 1–15 scored 1–4; items 16–35 scored 1–5; reverse-scored items 10, 12, 15, 20–28 (12 items); total range 35–160 (higher = greater literacy).
- PHQ-9 (9 items): 0–3 each; total 0–27; bands 0–4 minimal, 5–9 mild, 10–14 moderate, 15–19 moderately severe, 20–27 severe.
- Affiliate Stigma Scale (22 items): 1–4 each; total 22–88 (higher = greater stigma); subscales affective, cognitive, behavioural.

**S4. STROBE checklist (cross-sectional) — completed**

**Table S-STROBE**

*STROBE items and location*

| **#** | **Item** | **Reported (location)** |
| --- | --- | --- |
| 1 | Design in title/abstract | ✓ Title; Abstract |
| 2 | Background/rationale | ✓ Introduction |
| 3 | Objectives + hypotheses | ✓ Introduction (final para) |
| 4 | Study design | ✓ Method – Design |
| 5 | Setting/locations/dates | ✓ Methods + title page (Nov 2025–May 2026) |
| 6 | Participants/eligibility | ✓ Method – Participants |
| 7 | Variables | ✓ Method – Measures |
| 8 | Measurement | ✓ Method – Measures |
| 9 | Bias | ✓ Discussion – Limitations |
| 10 | Study size | ✓ Method – Participants |
| 11 | Quantitative variables | ✓ Method – Data analysis |
| 12 | Statistical methods | ✓ Method – Data analysis |
| 13 | Participants (flow) | ✓ Results; Figure 1 |
| 14 | Descriptive data | ✓ Table 1 |
| 15 | Outcome data | ✓ Tables 2–8 |
| 16 | Main results (with CIs) | ✓ Results |
| 17 | Other analyses | ✓ Results (EFA/CFA, known-groups) |
| 18 | Key results | ✓ Discussion |
| 19 | Limitations | ✓ Discussion |
| 20 | Interpretation | ✓ Discussion |
| 21 | Generalisability | ✓ Discussion |
| 22 | Funding | ✓ Title page (no funding) |

*Note.* COSMIN reporting standards for content validity, structural validity, internal consistency, construct validity and known-groups validity are addressed in the Method and Results; cross-cultural invariance and test–retest are declared as limitations.
